# Supplementary material
Source: Springer Nature journal article supplement (https://www.springermedizin.de/resource/supplementary/13054_2013_2526_MOESM9_ESM.pdf/9714230)
Supplement: MOESM9 [file 9714230]

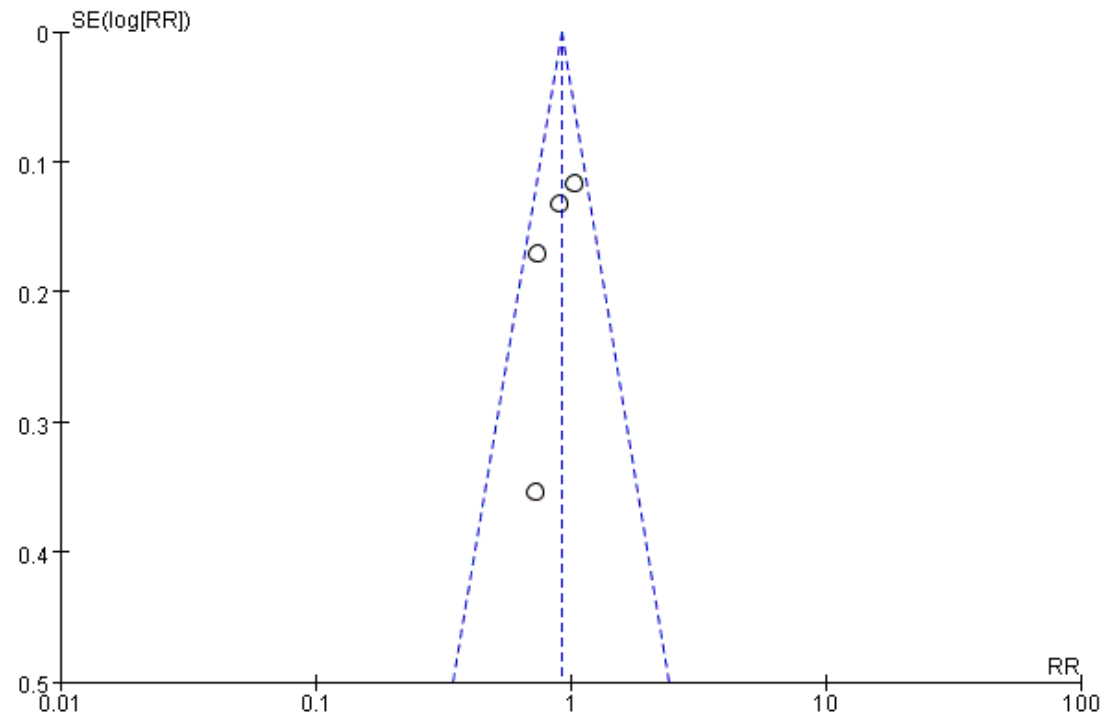

**Figure S4** Funnel plot for meta-analysis of the effect of PP on ICU mortality in ARDS patients with  $P/F \leq 300$  mm Hg.

The funnel plot showed the plots were symmetrical distributed, indicating no obvious publication bias. Each point represents one trial. RR, risk ratio; PP, prone positioning; ICU, intensive care unit; ARDS, acute respiratory distress syndrome; P/F, partial pressure of arterial oxygen/ inspired fraction of oxygen
